# Distribution of Spoligotyping Defined Genotypic Lineages among Drug-Resistant *Mycobacterium tuberculosis* Complex Clinical Isolates in Ankara, Turkey

Ozgul Kisa<sup>1\*</sup>, Gulnur Tarhan<sup>2</sup>, Selami Gunal<sup>3</sup>, Ali Albay<sup>1</sup>, Riza Durmaz<sup>3</sup>, Zeynep Saribas<sup>4</sup>, Thierry Zozio<sup>5</sup>, Alpaslan Alp<sup>4</sup>, Ismail Ceyhan<sup>2</sup>, Ahmet Tombak<sup>2</sup>, Nalin Rastogi<sup>5</sup>

**1** Department of Medical Microbiology, Gulhane Military Medical Academy and School of Medicine, Ankara, Turkey, **2** Tuberculosis Reference and Research Laboratory, Refik Saydam Hygiene Center, Ankara, Turkey, **3** Inonu University Faculty of Medicine, Department of Medical Microbiology, Inonu University, Malatya, Turkey, **4** Hacettepe University Faculty of Medicine, Department of Medical Microbiology, Hacettepe University, Ankara, Turkey, **5** WHO Supranational TB Reference Laboratory, Unité de la Tuberculose et des Mycobactéries, Institut Pasteur de Guadeloupe, Abymes, Guadeloupe, France

## Abstract

**Background:** Investigation of genetic heterogeneity and spoligotype-defined lineages of drug-resistant *Mycobacterium tuberculosis* clinical isolates collected during a three-year period in two university hospitals and National Tuberculosis Reference and Research Laboratory in Ankara, Turkey.

**Methods and Findings:** A total of 95 drug-resistant *M. tuberculosis* isolates collected from three different centers were included in this study. Susceptibility testing of the isolates to four major antituberculous drugs was performed using proportion method on Löwenstein–Jensen medium and BACTEC 460-TB system. All clinical isolates were typed by using spoligotyping and IS6110-restriction fragment length polymorphism (RFLP) methods. Seventy-three of the 95 (76.8%) drug resistant *M. tuberculosis* isolates were isoniazid-resistant, 45 (47.4%) were rifampicin-resistant, 32 (33.7%) were streptomycin-resistant and 31 (32.6%) were ethambutol-resistant. The proportion of multidrug-resistant isolates (MDR) was 42.1%. By using spoligotyping, 35 distinct patterns were observed; 75 clinical isolates were grouped in 15 clusters (clustering rate of 79%) and 20 isolates displayed unique patterns. Five of these 20 unique patterns corresponded to orphan patterns in the SITVIT2 database, while 4 shared types containing 8 isolates were newly created. The most prevalent *M. tuberculosis* lineages were: Haarlem (23/95, 24.2%), ill-defined T superfamily (22/95, 23.2%), the Turkey family (19/95, 20%; previously designated as LAM7-TUR, Beijing (6/95, 6.3%), and Latin-America & Mediterranean (LAM, 5/95 or 5.3%), followed by Manu (3/95, 3.2%) and S (1/95, 1%) lineages. Four of the six Beijing family isolates (66.7%) were MDR. A combination of IS6110-RFLP and spoligotyping reduced the clustering rate from 79% to 11.5% among the drug resistant isolates.

**Conclusions:** The results obtained showed that ill-defined T, Haarlem, the Turkey family (previously designated as LAM7-TUR family with high phylogeographical specificity for Turkey), Beijing and LAM were predominant lineages observed in almost 80% of the drug-resistant *M. tuberculosis* complex clinical isolates in Ankara, Turkey.

**Citation:** Kisa O, Tarhan G, Gunal S, Albay A, Durmaz R, et al. (2012) Distribution of Spoligotyping Defined Genotypic Lineages among Drug-Resistant *Mycobacterium tuberculosis* Complex Clinical Isolates in Ankara, Turkey. PLoS ONE 7(1): e30331. doi:10.1371/journal.pone.0030331

**Editor:** Mark Patrick Nicol, University of Cape Town, South Africa

**Received:** May 23, 2011; **Accepted:** December 14, 2011; **Published:** January 18, 2012

**Copyright:** © 2012 Kisa et al. This is an open-access article distributed under the terms of the Creative Commons Attribution License, which permits unrestricted use, distribution, and reproduction in any medium, provided the original author and source are credited.

**Funding:** The authors have no support or funding to report.

**Competing Interests:** The authors have declared that no competing interests exist.

\* E-mail: okisa@gata.edu.tr

## Introduction

Tuberculosis (TB) continues to be one of the prevalent infectious diseases. The global spread of the disease is further complicated by the ubiquitous appearance of drug resistant and especially MDR isolates (the latter being defined by combined resistance to isoniazid [INH] and rifampicin [RIF]) [1,2]. One of the greatest concerns of TB control programs is the emergence and spread of drug resistant and MDR-TB. According to a recent report of the Ministry of Health [3], with an incidence rate of 30 per 100,000 inhabitants, there were 16,760 new TB cases in Turkey in 2008 while the total number of TB cases was 18,452. The available figures for Ankara for the same year reported a total of 665 TB cases (55.8% male, 44.2% female, sex-ratio 1.26), with

smear and culture positivity rates of 56.2% and 71.4%, respectively. The resistance proportion to isoniazid, rifampicin, ethambutol, streptomycin, and MDR were 13.8%, 6.6%, 4.3%, 7.5%, and 5.3% respectively [3]. According to the results of the previous studies from different parts of Turkey, the resistance rates to at least one drug ranged from 14.9% to 40.2% [4–7]. Also, MDR rates were between 1.7% and 19.7% [4–6].

Study of genotyping diversity of drug resistant *M. tuberculosis* isolates from infected individuals can provide useful information about the origin and transmission of the drug resistant isolates [8–11]. Although the rates of drug resistant *M. tuberculosis* isolates are high in Turkey, the information about resistant *M. tuberculosis* genotypes circulating in the country is very limited. Despite several publications dealing with *M. tuberculosis* genotyping in Turkey

[1,8,12–16], only two investigations reported spoligotyping-based characterization of drug resistant *M. tuberculosis* isolates [1,8]. This study was therefore planned to estimate the clustering rate and pinpoint precisely the prevalent lineages among the drug resistant *M. tuberculosis* isolates in Ankara, the capital city of Turkey. For this purpose we used spoligotyping and IS6110-RFLP that are two well-established methods used frequently to highlight transmission dynamics and phylogenetic distribution of *M. tuberculosis* isolates all over the world [10,17–19]. PCR-based spoligotyping is rapid, cost-effective, and allows concomitantly to differentiate mycobacterial species within the *M. tuberculosis* complex as well as to easily identify specific genotypes such as those belonging to the Beijing lineage [20], while IS6110-RFLP allows to substantially reduce the overestimation of clustered *M. tuberculosis* isolates by spoligotyping used alone as a first-line typing method [12].

## Materials and Methods

### Patient population and bacterial isolates

Our analysis was based on 95 *M. tuberculosis* isolates from various clinical samples from 2004 to the end of 2006 (1 isolate per patient; n = 35 from Mycobacteriology laboratory of Gulhane Military Medical Academy, n = 33 from Hacettepe University, and n = 27 from National TB Reference and Research Laboratory in the Refik Saydam Hygiene Center, Ankara). The ages of the 95 patients ranged from 19 to 70 years, with a mean of  $38.12 \pm 19.18$ . It should be noted that all *M. tuberculosis* isolate found to be drug-resistant from the study laboratories over the study period were included in this study and no other selection criteria than drug-resistance were retained. More specifically, due to a lack of systematic sampling in our region, it is difficult to interpret our study sample in terms of representativity in a national context; hence we have arbitrarily decided to designate it as a “convenience sample”.

### Identification and drug susceptibility testing

Differentiation of the *M. tuberculosis* complex and non-tuberculous mycobacteria was achieved by selective inhibition of the *M. tuberculosis* isolates in the presence of 5 µl/ml of p-nitro- $\alpha$ -acetyl-amino- $\beta$ -hydroxypropiophenone (NAP) according to the BACTEC manual [21]. All isolates grown on LJ media were identified as *M. tuberculosis* by using biochemical tests, including production of niacin, catalase activity, nitrate reduction, pigment production and growth rate [22]. Drug susceptibility testing against rifampicin (R), isoniazid (I), streptomycin (S), and ethambutol (E) was performed by using the BACTEC 460-TB according to the manufacturer’s instruction or standard proportion method on LJ medium [21,23]. Multidrug-resistant (MDR) clinical isolates were defined as simultaneous resistance to I+R, with or without additional drug resistance.

Verbal consent for diagnosis of TB and detection of drug resistance in *M. tuberculosis* isolates were obtained from all patients. Nonetheless, since the resistant isolates were collected from patients’ routine samples, this study was considered as a laboratory study and ethics approval from institutional ethics committee was not required.

### DNA extraction

A loopful of bacteria colonies was suspended in 400 µl 1 × TE buffer (10 mM Tris, 1 mM EDTA, pH 8.0), and inactivated at 80°C for 20 minutes. Bacterial DNA was extracted by the standard cetyl-trimethyl ammonium bromide (CTAB) (Merck, Darmstadt, Germany) method, as described previously [24]. The pellet of DNA was dried at room temperature, resuspended in 1 × TE buffer and stored at 4°C until use.

## Spoligotyping

Spoligotyping was carried out with a commercial kit (Isogen Bioscience BV, Maarssen, The Netherlands) according to the manufacturer’s instructions [11]. The 43 spacers between the direct repeats in the target region were amplified by using DRa biotinylated at the 5’ end and DRb primers. The PCR product was hybridized to a membrane containing 43 oligonucleotides derived from the spacer sequences of *M. tuberculosis* H37Rv and *M. bovis* BCG P3 by reverse line blotting. *M. tuberculosis* H37Rv and *M. bovis* BCG P3 were used as control for spoligotyping. Spoligotypes results were converted into octal code and in the SITVIT2 proprietary database of the Pasteur Institute of Guadeloupe, which is an updated version of the previously released SpoIDB4 database (available at <http://www.pasteur-guadeloupe.fr:8081/SITVITDemo>). At the time of the present study, the database contained genotyping information on about 67,000 *M. tuberculosis* clinical isolates from 160 countries of origin. In this database, spoligotype international type (SIT) designates a spoligotyping pattern shared by two or more patient isolates. Major spoligotyping-based phylogenetic clades were assigned according to signatures provided in SpoIDB4.

### IS6110-RFLP typing

IS6110-RFLP genotyping was performed by the standardized methods described previously [25]. Briefly, the extracted DNA of clinical isolates was digested with PvuII enzyme and DNA fragments were subjected to electrophoresis. The restriction fragments on the gel were denatured, blotted onto nylon membrane by the alkaline transfer procedure and hybridized by IS6110 probe. After hybridization, the results were analyzed by using H37Rv as an internal marker, and comparison was done using Bionumerics (Applied Maths, Sint-Martens-Latem, Belgium).

## Results

### Drug susceptibility

All of the *M. tuberculosis* isolates were resistant to at least one of the major antituberculous drugs. Seventy-three of the 95 *M. tuberculosis* isolates (76.8%) were resistant to isoniazid, 45 (47.4%)

**Table 1.** Drug resistance patterns of the 95 drug-resistant *M. tuberculosis* isolates from Ankara, Turkey.

| Drugs            | Number of the resistant isolates<br>n (%) |
|------------------|-------------------------------------------|
| Streptomycin (S) | 32(33.6)                                  |
| Isoniazid (I)    | 73 (76.8)                                 |
| Rifampicin (R)   | 45 (47.4)                                 |
| Ethambutol (E)   | 31 (32.6)                                 |
| S+I              | 12 (12.6)                                 |
| I+E              | 2 (2.1)                                   |
| R+E              | 2 (2.1)                                   |
| S+H+R            | 5 (5.3)                                   |
| I+R+E            | 14 (14.7)                                 |
| S+H+R+E          | 10 (10.5)                                 |
| Total MDR (I+R)  | 40 (42.1)                                 |
| Total            | 95                                        |

doi:10.1371/journal.pone.0030331.t001



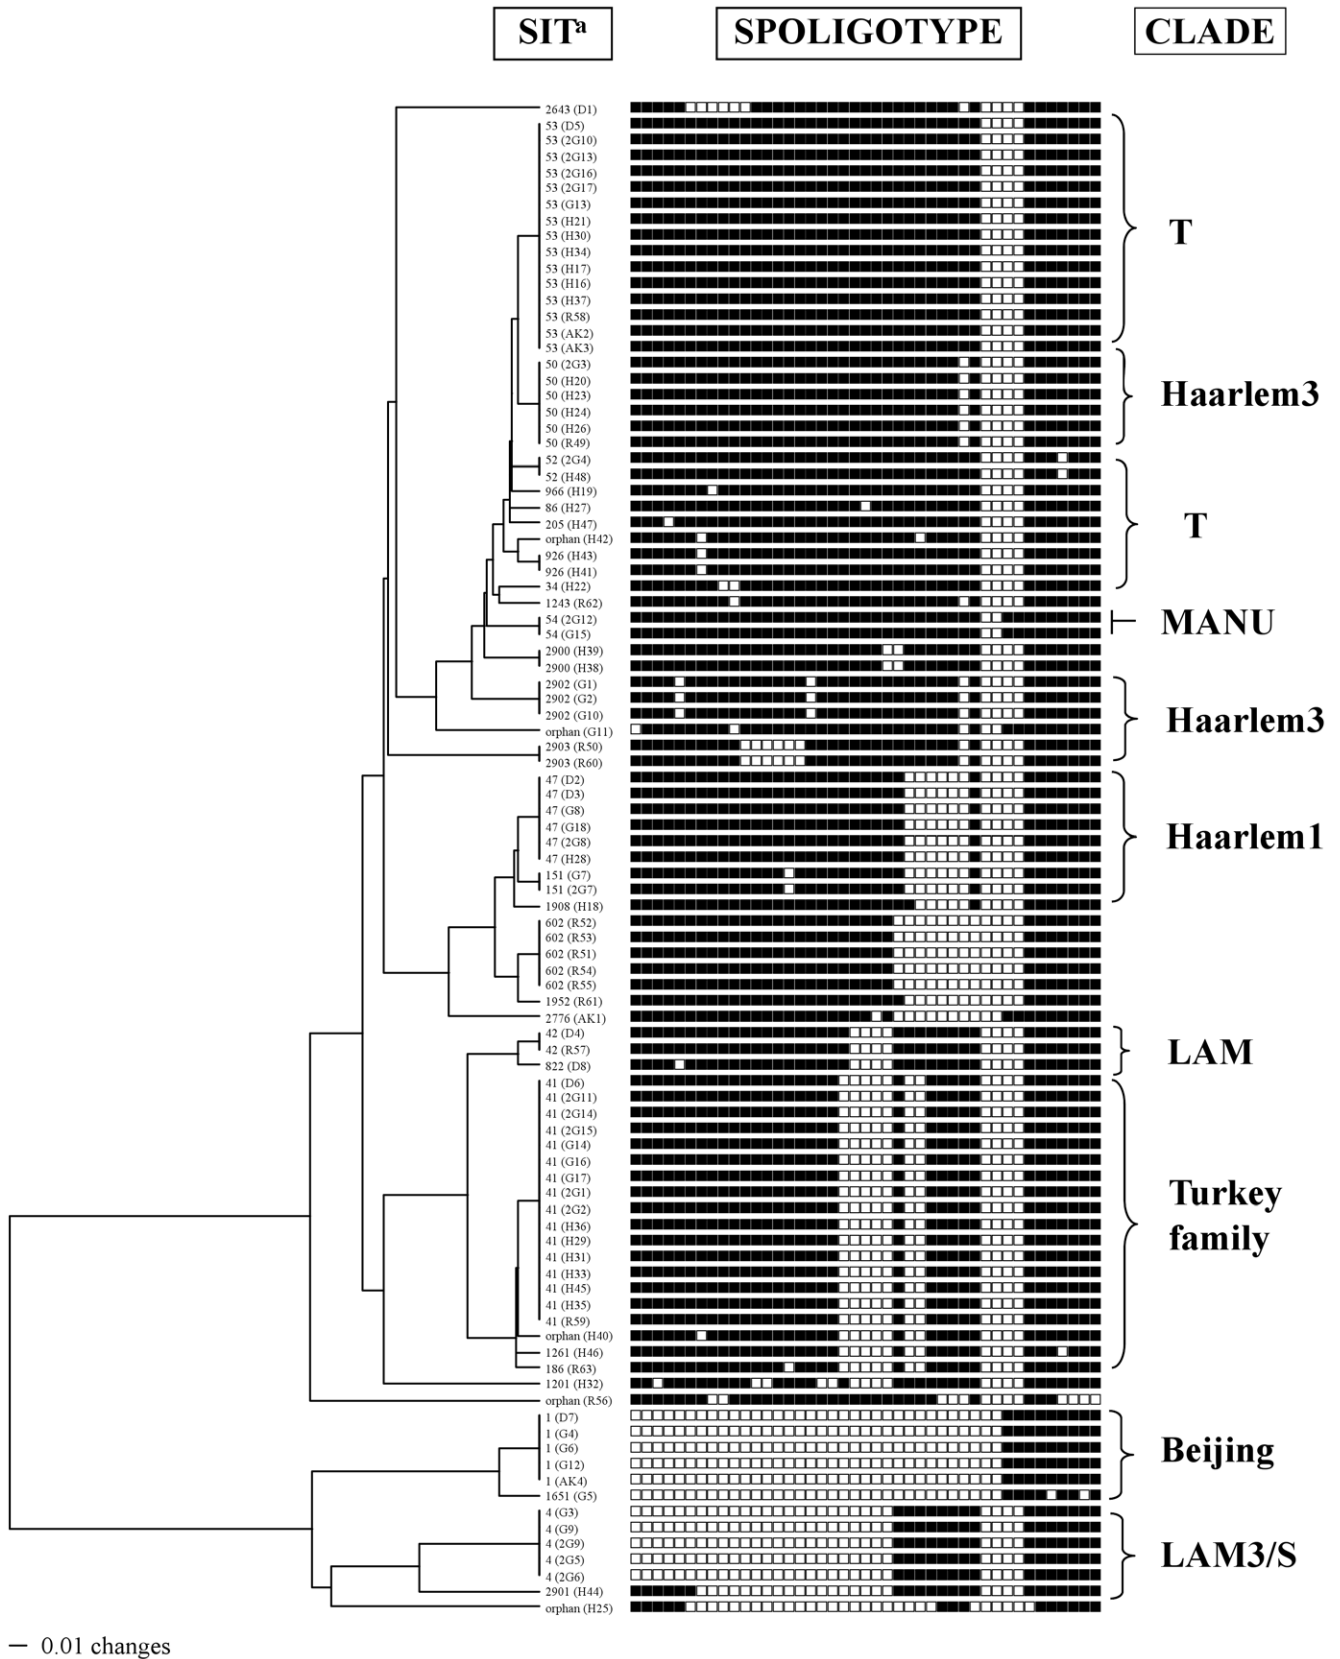

— 0.01 changes

**Figure 1. Tree of spoligotype *M. tuberculosis* isolates (n= 95 strains), by using the PAUP 4.0b software and the UPGMA method.** <sup>a</sup>SIT, Spoligotype International Type as defined in the SITVIT2 proprietary database of the Pasteur Institute of Guadeloupe. In the figure, the column below the subtitle SIT shows the individual SIT number followed by strain number.  
doi:10.1371/journal.pone.0030331.g001





have a spoligotype pattern very close to LAM lineage, they do not belong to the LAM lineage sensu-stricto [30]; instead these strains share a SNP ligC (809 tgg [trp] to ttg [leu]) with the T3-Osaka lineage [30]. Nonetheless, these new results do not question the phylogeographical specificity of this lineage defined by its prototype SIT41 in the SpolDB4 database [27]. Awaiting a detailed molecular characterization of this unique lineage in future studies, we have hereby renamed the LAM7-TUR lineage as the “Turkey” family.

The current study also showed that 19/95 or 20% of the drug-resistant isolates belonged to the Turkey family, and represented 5/40 or 12.5% of the MDR isolates. The proportion of drug-resistant versus MDR isolates for other major lineages was: Haarlem (24.2% vs. 20%), ill-defined T superfamily (23.2% vs. 30%), Beijing (6.3% vs. 10%), Manu (3.2% vs. 2.5%) and S (1% vs. 0%) lineages. However, if the percentage of MDR isolates was considered within each of the families individually, the order was as follows: Beijing (4/6, 66.7%), LAM (3/5, 60%), T (12/22, 54.5%), Haarlem (8/23, 34.8%), Manu (1/3, 33.3%), the Turkey family (5/19, 26.3%), and S (0/1, 0%).

According to the previous studies performed in Turkey, the four most prevalent spoligotype patterns in Turkey were: ill-defined T/SIT53, Turkey family/SIT41, H1/SIT47, and H3/SIT50 [8,13,14,16]. Although, additional analysis of isolates from various regions of Turkey will be necessary to determine the actual prevalence of these genotypes, our study corroborates these findings and indicates that the Turkey family can be considered as a major type with demonstrated phylogeographical specificity for Turkey as opposed to SIT47, SIT50 and SIT53 that are distributed equally in Turkey and elsewhere [10,20,30,31]. Indeed, a cross-checking of the SITVIT2 database on November 24<sup>th</sup> 2011 showed that Turkey/SIT41 isolates in the database (n = 357) are almost exclusively isolated in Turkey (n = 212 or 59.38% of the isolates). The results of this study also revealed 4 newly-created shared types (SIT2900, SIT2901, SIT2902 and SIT2903) and 2 of these containing 5 strains were exclusively found in the present study (SIT2902, SIT2903; Table 2). Coupled to the observation of 5 orphan clinical isolates (Table 3), our study indicates that the bulk of TB in Ankara is caused both by strains that are restricted to our local population (as reflected by newly-created shared types or orphans restricted to Ankara as well as endemic strains such as SIT41 belonging to the Turkey family) and those that are present elsewhere (SIT47, SIT50 and SIT53) [8,14,16].

Beijing genotype of *M. tuberculosis* has been observed to be highly prevalent throughout Asia and in the countries of the former Soviet Union [32]. Although the Beijing genotype was found only in 6/95 or 6.3% isolates in our study, it corresponded to the lineage with the highest proportion of MDR isolates since 4/6 isolates or 66.7% were MDR. As summarized in Table 4, the relative occurrence of Beijing genotype at 6.3% in the present study was significantly higher than in previous studies from Turkey (0.5%, 1.7%, and 1.8%, respectively) [8,13,14]. Seeing the sample

**Table 4.** Statistical comparison of Beijing isolates in this study and in the previously published studies from Turkey.

|                          | Reference | Beijing n (%) | Other lineages n (%) | Chi-2 | p Value |
|--------------------------|-----------|---------------|----------------------|-------|---------|
| This study               | -         | 6 (6.3%)      | 89 (93.7%)           | 11.06 | 0.01    |
| Durmaz et al., 2007 [8]  |           | 1 (0.5%)      | 199 (99.5%)          |       |         |
| Gencer et al., 2005 [13] |           | 2 (1.7%)      | 114 (98.3%)          |       |         |
| Kisa et al., 2007 [14]   |           | 7 (1.8%)      | 360 (98.1%)          |       |         |

doi:10.1371/journal.pone.0030331.t004

size, our attempts to compare lineages in case of MDR versus mono-resistant isolates did not result in any statistically significant differences. For the same reason, one may be cautious not to overestimate the prevalence of the Beijing genotype and its probable role in current MDRTB transmission; nonetheless, these observations should not be overlooked while considering the emergence and spread of drug resistant and MDR-TB by the national TB control program.

In conclusion, this study showed that the 5 major lineages observed among the drug-resistant *M. tuberculosis* clinical isolates in Ankara were: Haarlem 24.2%; ill-defined T superfamily 23.2%; the Turkey family (previously designated as LAM7-TUR) 20%; Beijing 6.3%; and LAM 5.3. A high proportion of these strains (42.1%) corresponded to MDR isolates with the following main lineages: T 30%; Haarlem 20%; the Turkey family 12.5%; Beijing 10%; and LAM 7.5. However, the order was reversed if the percentage of MDR isolates was calculated within a genotypic lineage individually as: Beijing 66.7%; LAM 60%; T 54.5%; Haarlem 34.8%; Manu 33.3%; and the Turkey family 26.3%. We showed that the bulk of drug-resistant TB in Ankara is caused both by strains that are endemic to the local population (as reflected by newly-created shared types or orphans restricted to Ankara as well as endemic strains such as SIT41 belonging to the Turkey family) and those that are present elsewhere in the world (SIT47, SIT50 and SIT53). Last but not least, the role of Beijing genotype in current MDR-TB transmission in Ankara and elsewhere in Turkey must be reassessed in future studies.

## Acknowledgments

We are grateful to the Regional Council of Guadeloupe (CR/08-1612: Biodiversité et Risque Infectieux dans les modèles insulaires) for their contributions to the project.

## Author Contributions

Conceived and designed the experiments: OK GT. Performed the experiments: OK GT A. Albay RD SG. Analyzed the data: OK A. Albay GT RD NR TZ. Contributed reagents/materials/analysis tools: OK A. Albay GT RD A. Alp ZS IC AT. Wrote the paper: OK A. Albay RD.

## References

- Cavusoglu C, Durmaz R, Bilgic A, Gunal S (2004) Genotyping of rifampin-resistant *Mycobacterium tuberculosis* isolates from western Turkey. *Ann Saudi Med* 24: 102–105.
- Cohn DL, Bustreo F, Raviglione MC (1997) Drug-resistant tuberculosis review of the worldwide situation and the WHO/IUATLD global surveillance project. *Clin Infect Dis* 24: 121–130.
- Ministry of Health of Turkey (2010) Fight Against Tuberculosis 2010 Report. Ankara, Turkey: Ministry of Health of Turkey.
- Balci I, Dikensoy O, Bayram A, Filiz A (2000) Drug-resistant tuberculosis at the university hospital in Gaziantep, South-eastern Turkey. *J Int Med Res* 28: 300–306.
- Bengisun S, Karnak D, Palabiyikoglu I, Saygun N (2000) *Mycobacterium tuberculosis* drug resistance in Turkey, 1976–1997. *Scand J Infect Dis* 32: 507–510.
- Kisa O, Albay A, Baylan O, Balkan A, Doganci L (2003) Drug resistance in *Mycobacterium tuberculosis*: a retrospective study from 2000-bed teaching hospital in Ankara, Turkey. *Int J Antimicrob Agents* 22: 456–457.
- Tahaoglu K, Kizkin O, Karagöz T, Tor M, Partal M, et al. (1994) High initial and acquired drug resistance in pulmonary tuberculosis in Turkey. *Tuber Lung Dis* 75: 324–328.
- Durmaz R, Zozio T, Gunal S, Yaman A, Cavusoglu C, et al. (2007) Genetic diversity and major spoligotype families of drug-resistant *Mycobacterium tuberculosis* clinical isolates from different regions of Turkey. *Infect Genet Evol* 7: 513–519.

9. Easterbrook PJ, Gibson A, Murad S, Lamprecht D, Ives N, et al. (2004) High rates of clustering of strains causing tuberculosis in Harare, Zimbabwe: a molecular epidemiological study. *J Clin Microbiol* 42: 4536–4544.
10. Filliol I, Driscoll JR, van Soolingen D, Kreiswirth B, Kremer K, et al. (2003) Snapshot of moving and expanding clones of *Mycobacterium tuberculosis* and their global distribution assessed by spoligotyping in an international study. *J Clin Microbiol* 41: 1963–1970.
11. Kamerbeek J, Schouls L, Kolk A, van Agterveld M, van Soolingen D, et al. (1997) Simultaneous detection and strain differentiation of *Mycobacterium tuberculosis* for diagnosis and epidemiology. *J Clin Microbiol* 35: 907–914.
12. Durmaz R, Zozio T, Gunal S, Allix C, Fauville-Dufaux M, et al. (2007) Population-based molecular epidemiological study of tuberculosis in Malatya, Turkey. *J Clin Microbiol* 45: 4027–4035.
13. Gencer B, Shinnick MT (2005) Molecular genotyping of *Mycobacterium tuberculosis* Isolates from Turkey. *Am J Infect Dis* 1: 5–11.
14. Kisa O, Albay A, Baylan O, Tozkoparan E, Acikel CH, et al. (2007) Genetic diversity of *Mycobacterium tuberculosis* isolates at the Military Medical Academy in Ankara, Turkey. *Res Microbiol* 158: 318–323.
15. Oflu B, Durmaz R, Gunal S, Sola C, Zozio T, et al. (2009) Beijing/W and major spoligotype families of *Mycobacterium tuberculosis* strains isolated from tuberculosis patients in Eastern Turkey. *New Microbiol* 32: 255–263.
16. Zozio T, Allix C, Gunal S, Saribas Z, Alp A, et al. (2005) Genotyping of *Mycobacterium tuberculosis* clinical isolates in two cities of Turkey: Description of a new family of genotypes that is phylogeographically specific for Asia Minor. *BMC Microbiology* 5: 44.
17. Kulkarni S, Sola C, Filliol I, Rastogi N, Kadival G (2005) Spoligotyping of *Mycobacterium tuberculosis* isolates from patients with pulmonary tuberculosis in Mumbai, India. *Res Microbiol* 156: 588–596.
18. Puustinen K, Marjamaki M, Rastogi N, Sola C, Filliol I, et al. (2003) Characterization of Finnish *Mycobacterium tuberculosis* isolates by spoligotyping. *J Clin Microbiol* 41: 1525–1528.
19. Sola C, Filliol I, Legrand E, Lesjean S, Locht C, et al. (2003) Genotyping of the *Mycobacterium tuberculosis* complex using MIRUs: association with VNTR and spoligotyping for molecular epidemiology and evolutionary genetics. *Infect Genet Evol* 3: 125–133.
20. Sola C, Filliol I, Gutierrez MC, Mokrousov I, Vincent V, et al. (2001) Spoligotype database of *Mycobacterium tuberculosis* biogeographic distribution of shared types and epidemiologic and phylogenetic perspectives. *Emerg Infect Dis* 7: 390–396.
21. Siddiqi SH (1996) Procedure for primary isolation of mycobacteria from clinical specimens. In: BACTEC TB system product and procedure manual Becton Dickinson, Maryland, Revision E. pp II.1–II.13.
22. Kent PT, Kubica GP (1985) Public health mycobacteriology. A guide for a level III laboratory. Center for Disease Control, Atlanta, GA.
23. Canetti G, Fox W, Khomenko A, Mahler HT, Menon NK, et al. (1969) Advances in techniques of testing mycobacterial drug sensitivity, and the use of sensitivity tests in tuberculosis control programmes. *Bull World Health Organ* 41: 21–43.
24. van Soolingen D, Hermans PW, de Haas PE, Soll DR, van Embden JD (1991) Occurrence and stability of insertion sequences in *Mycobacterium tuberculosis* complex strains: evaluation of an insertion sequence-dependent DNA polymorphism as a tool in the epidemiology of tuberculosis. *J Clin Microbiol* 29: 2578–2586.
25. van Embden JD, Cave MD, Crawford JT, Dale JW, Eisenach KD, et al. (1993) Strain identification of *Mycobacterium tuberculosis* by DNA fingerprinting: recommendations for a standardized methodology. *J Clin Microbiol* 31: 406–409.
26. Corbett E, Watt CJ, Maher D, Williams BG, Ravighione MC (2003) The growing burden of tuberculosis: global trends and interactions with the HIV epidemic. *Arch Intern Med* 163: 1009–1021.
27. Brudey K, Driscoll JR, Rigouts L, Prodinger WM, Gori A, et al. (2006) *Mycobacterium tuberculosis* complex genetic diversity: mining the fourth international spoligotyping database (SpolDB4) for classification, population genetics, and epidemiology. *BMC Microbiol* 6: 23.
28. Small PM, Hopewell PC, Singh SP, Paz A, Parsonnet J, et al. (1994) The epidemiology of tuberculosis in San Francisco. A population-based study using conventional and molecular methods. *N Engl J Med* 330: 1703–1709.
29. Brudey K, Gordon M, Mostrom P, Svensson L, Jonsson B, et al. (2004) Molecular epidemiology of *Mycobacterium tuberculosis* in western Sweden. *J Clin Microbiol* 42: 3046–3051.
30. Abadia E, Zhang J, dos Vultos T, Ritacco V, Kremer K, et al. (2010) Resolving lineage assignment on *Mycobacterium tuberculosis* clinical isolates classified by spoligotyping with a new high-throughput 3R SNPs based method. *Infect Genet Evol* 107: 1066–1074.
31. Filliol I, Driscoll JR, Van Soolingen D, Kreiswirth BN, Kremer G, et al. (2002) Global distribution of *Mycobacterium tuberculosis* spoligotypes. *Emerg Infect Dis* 8: 1347–1349.
32. Toungousova OS, Sandven P, Mariandyshv AO, Nizovtseva NI, Bjune G, et al. (2002) Spread of drug-resistant *Mycobacterium tuberculosis* strains of the Beijing genotype in the Archangel Oblast, Russia. *J Clin Microbiol* 40: 1930–1937.
